# Supplementary material for: Transcriptional factor OCT4 promotes esophageal cancer metastasis by inducing epithelial-mesenchymal transition through VEGF-C/VEGFR-3 signaling pathway
Source: PubMed Central journal article supplement (PMC5641101; doi:10.18632/oncotarget.18035), 2017-05-20
Supplement: oncotarget-08-71933-s001.pdf [file oncotarget-08-71933-s001.pdf]

## Transcriptional factor OCT4 promotes esophageal cancer metastasis by inducing epithelial-mesenchymal transition through VEGF-C/VEGFR-3 signaling pathway

### SUPPLEMENTARY MATERIALS

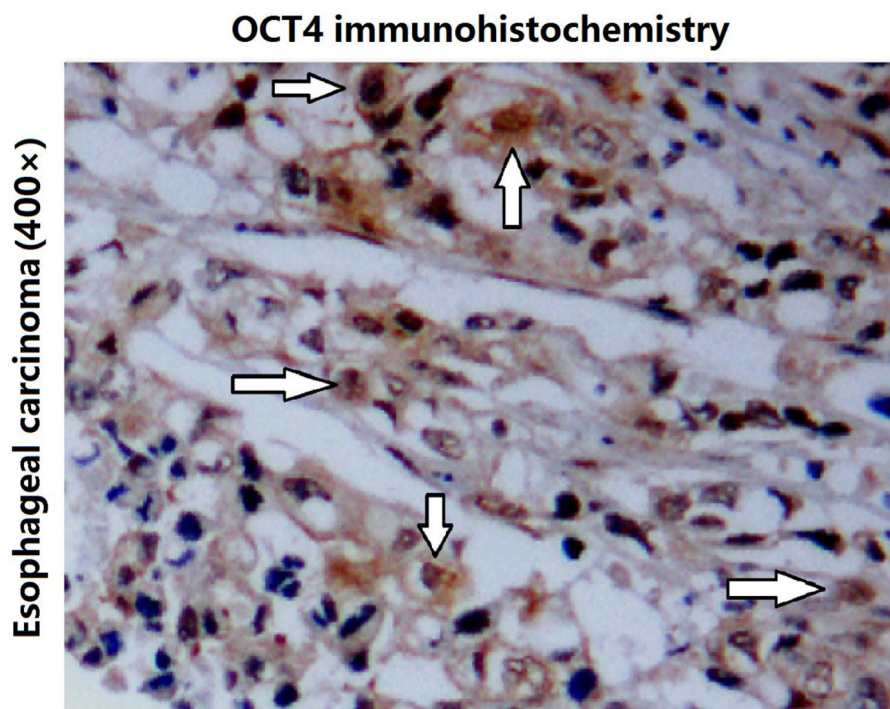

**Supplementary Figure 1: OCT4 was positive mainly in nuclei of the TE1 cell xenograft tumor cells.** The TE1 xenograft tumors were removed from mice and fixed in 10% formalin, paraffin-embedded, and sectioned for detecting the expression level of OCT4 by immunohistochemistry. Sections were observed under a microscope within five high-power fields (objective lens 20x) to count the percentages of positive cells. The positive OCT4 was localized mainly in nuclei (as the blank arrows showed); primary magnification: 400x.

## VEGFR-3 immunohistochemistry

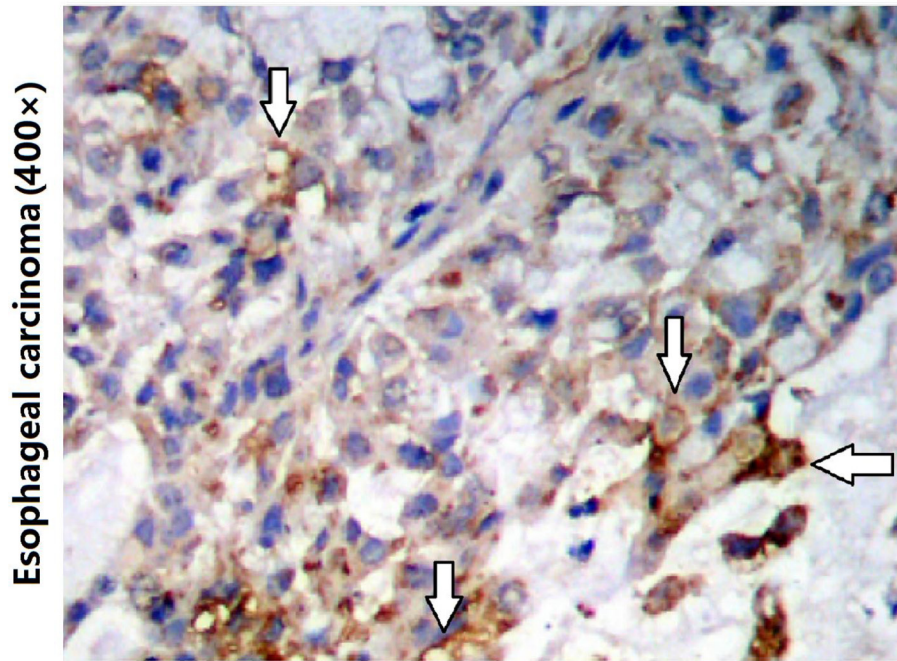

**Supplementary Figure 2: VEGFR-3 was positive mainly in membrane of the TE1 cell xenograft tumor cells.** The TE1 xenograft tumors were removed from mice and fixed in 10% formalin, paraffin-embedded, and sectioned for detecting the expression level of VEGFR-3 by immunohistochemistry. Sections were observed under a microscope within five high-power fields (objective lens 20×) to count the percentages of positive cells. The positive VEGFR-3 was localized mainly in membrane but it is unevenly distributed and showed granular (as the blank arrows showed); primary magnification: 400×.

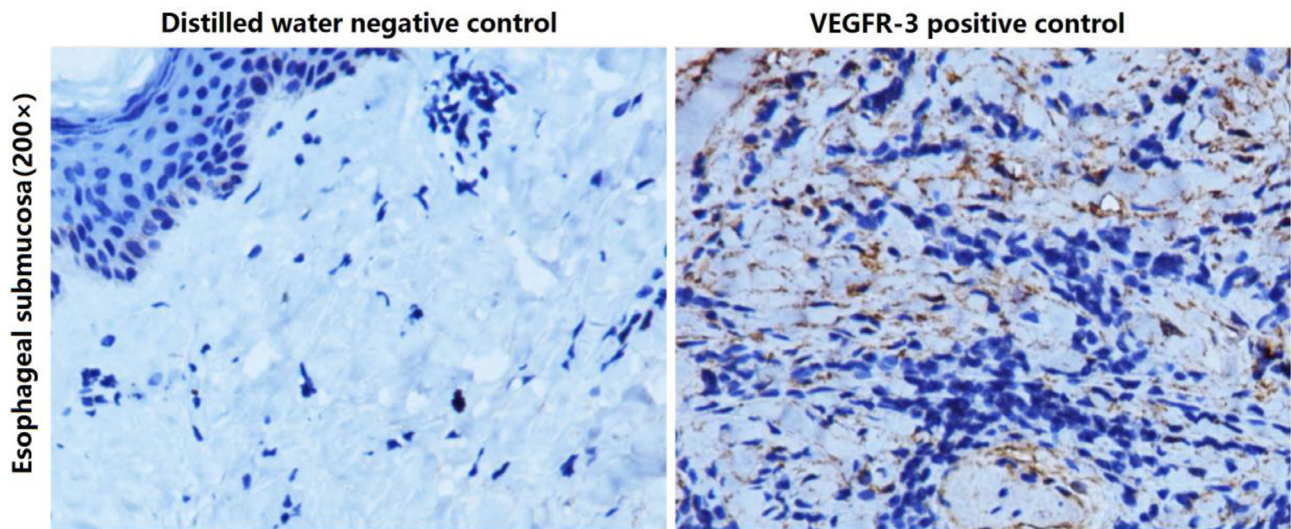

**Supplementary Figure 3: Installation of immunohistochemical controls.** It is generally believed that VEGFR-3 is primarily expressed in lymphatic vessels, therefore, we chose the tissue of esophageal submucosa as controls, because there are more lymphatic vessels within esophageal submucosa. The diluted water instead of VEGFR-3 antibody was set up as a negative control, and the VEGFR-3 antibody IHC staining as a positive control to show the positive expression of VEGFR-3 in lymphatic vessels.

**Supplementary Table 1: Correlation between survival of ECC patients and OCT4 expression**

| Group         | Time (m) | Status   | Cumulative proportion of the survival |                | Cumulative number | Remaining case number |
|---------------|----------|----------|---------------------------------------|----------------|-------------------|-----------------------|
|               |          |          | Estimation                            | Standard error |                   |                       |
|               |          |          |                                       |                |                   |                       |
| OCT4-Positive | 1        | Death    | .933                                  | .064           | 1                 | 14                    |
|               | 2        | Survival | .                                     | .              | 1                 | 13                    |
|               | 3        | Survival | .                                     | .              | 1                 | 12                    |
|               | 4        | Survival | .                                     | .              | 1                 | 11                    |
|               | 5        | Death    | .848                                  | .100           | 2                 | 10                    |
|               | 6        | Survival | .                                     | .              | 2                 | 9                     |
|               | 7        | Death    | .754                                  | .126           | 3                 | 8                     |
|               | 8        | Survival | .                                     | .              | 3                 | 7                     |
|               | 9        | Survival | .                                     | .              | 3                 | 6                     |
|               | 10       | Death    | .629                                  | .155           | 4                 | 5                     |
|               | 11       | Death    | .503                                  | .168           | 5                 | 4                     |
|               | 12       | Death    | .377                                  | .166           | 6                 | 3                     |
|               | 13       | Death    | .251                                  | .151           | 7                 | 2                     |
|               | 14       | Death    | .126                                  | .117           | 8                 | 1                     |
|               | 15       | Death    | .000                                  | .000           | 9                 | 0                     |
| OCT4-Negative | 1        | Death    | .977                                  | .023           | 1                 | 42                    |
|               | 2        | Survival | .                                     | .              | 1                 | 41                    |
|               | 3        | Survival | .                                     | .              | 1                 | 40                    |
|               | 4        | Survival | .                                     | .              | 1                 | 39                    |
|               | 5        | Death    | .952                                  | .033           | 2                 | 38                    |
|               | 6        | Death    | .927                                  | .041           | 3                 | 37                    |
|               | 7        | Death    | .902                                  | .047           | 4                 | 36                    |
|               | 8        | Death    | .877                                  | .052           | 5                 | 35                    |
|               | 9        | Death    | .852                                  | .056           | 6                 | 34                    |
|               | 10       | Survival | .                                     | .              | 6                 | 33                    |
|               | 11       | Death    | .826                                  | .060           | 7                 | 32                    |
|               | 12       | Death    | .800                                  | .063           | 8                 | 31                    |
|               | 13       | Survival | .                                     | .              | 8                 | 30                    |
|               | 14       | Death    | .773                                  | .067           | 9                 | 29                    |
|               | 15       | Death    | .747                                  | .069           | 10                | 28                    |
|               | 16       | Survival | .                                     | .              | 10                | 27                    |
|               | 17       | Survival | .                                     | .              | 10                | 26                    |
|               | 18       | Survival | .                                     | .              | 10                | 25                    |
|               | 19       | Death    | .717                                  | .073           | 11                | 24                    |
|               | 20       | Survival | .                                     | .              | 11                | 23                    |
|               | 21       | Survival | .                                     | .              | 11                | 22                    |
|               | 22       | Survival | .                                     | .              | 11                | 21                    |
|               | 23       | Survival | .                                     | .              | 11                | 20                    |
|               | 24       | Death    | .681                                  | .078           | 12                | 19                    |
|               | 25       | Survival | .                                     | .              | 12                | 18                    |
|               | 26       | Death    | .643                                  | .082           | 13                | 17                    |
|               | 27       | Death    | .605                                  | .085           | 14                | 16                    |
|               | 28       | Death    | .567                                  | .088           | 15                | 15                    |
|               | 29       | Death    | .530                                  | .090           | 16                | 14                    |
|               | 30       | Survival | .                                     | .              | 16                | 13                    |
|               | 31       | Survival | .                                     | .              | 16                | 12                    |
|               | 32       | Death    | .485                                  | .093           | 17                | 11                    |
|               | 33       | Survival | .                                     | .              | 17                | 10                    |
|               | 34       | Death    | .437                                  | .095           | 18                | 9                     |
|               | 35       | Survival | .                                     | .              | 18                | 8                     |
|               | 36       | Death    | .382                                  | .098           | 19                | 7                     |
|               | 37       | Survival | .                                     | .              | 19                | 6                     |
|               | 38       | Survival | .                                     | .              | 19                | 5                     |
|               | 39       | Death    | .306                                  | .104           | 20                | 4                     |
|               | 40       | Death    | .229                                  | .102           | 21                | 3                     |
|               | 41       | Survival | .                                     | .              | 21                | 2                     |
|               | 42       | Death    | .                                     | .              | 22                | 1                     |
|               | 43       | Death    | .000                                  | .000           | 23                | 0                     |

**Supplementary Table 2: Correlation between survival of ECC patients and VEGF-C expression**

| Group          | Time (m) | Status  | Cumulative proportion of the survival |                | Cumulative number | Remaining case number |       |
|----------------|----------|---------|---------------------------------------|----------------|-------------------|-----------------------|-------|
|                |          |         | Estimation                            | Standard error |                   |                       |       |
|                |          |         | VEGFC-Positive                        | 1              |                   |                       | 9.800 |
|                | 2        | 14.030  | Survival                              | .              | .                 | 1                     | 26    |
|                | 3        | 19.570  | Survival                              | .              | .                 | 1                     | 25    |
|                | 4        | 21.330  | Survival                              | .              | .                 | 1                     | 24    |
|                | 5        | 23.170  | Death                                 | .924           | .052              | 2                     | 23    |
|                | 6        | 29.000  | Death                                 | .884           | .063              | 3                     | 22    |
|                | 7        | 29.570  | Death                                 | .844           | .072              | 4                     | 21    |
|                | 8        | 31.900  | Death                                 | .804           | .079              | 5                     | 20    |
|                | 9        | 32.730  | Death                                 | .763           | .085              | 6                     | 19    |
|                | 10       | 33.370  | Death                                 | .723           | .089              | 7                     | 18    |
|                | 11       | 38.870  | Survival                              | .              | .                 | 7                     | 17    |
|                | 12       | 39.730  | Survival                              | .              | .                 | 7                     | 16    |
|                | 13       | 43.070  | Death                                 | .678           | .094              | 8                     | 15    |
|                | 14       | 44.470  | Survival                              | .              | .                 | 8                     | 14    |
|                | 15       | 56.730  | Death                                 | .630           | .099              | 9                     | 13    |
|                | 16       | 64.530  | Survival                              | .              | .                 | 9                     | 12    |
|                | 17       | 68.170  | Survival                              | .              | .                 | 9                     | 11    |
|                | 18       | 71.530  | Survival                              | .              | .                 | 9                     | 10    |
|                | 19       | 77.570  | Death                                 | .567           | .107              | 10                    | 9     |
|                | 20       | 78.000  | Survival                              | .              | .                 | 10                    | 8     |
|                | 21       | 84.330  | Death                                 | .496           | .115              | 11                    | 7     |
|                | 22       | 86.200  | Death                                 | .              | .                 | 12                    | 6     |
|                | 23       | 86.200  | Death                                 | .354           | .118              | 13                    | 5     |
|                | 24       | 90.630  | Death                                 | .283           | .114              | 14                    | 4     |
|                | 25       | 93.070  | Survival                              | .              | .                 | 14                    | 3     |
|                | 26       | 94.000  | Death                                 | .189           | .108              | 15                    | 2     |
|                | 27       | 95.830  | Death                                 | .094           | .086              | 16                    | 1     |
|                | 28       | 100.300 | Death                                 | .000           | .000              | 17                    | 0     |
| VEGFC-Negative | 1        | 12.670  | Death                                 | .967           | .033              | 1                     | 29    |
|                | 2        | 13.370  | Survival                              | .              | .                 | 1                     | 28    |
|                | 3        | 14.430  | Survival                              | .              | .                 | 1                     | 27    |
|                | 4        | 19.200  | Survival                              | .              | .                 | 1                     | 26    |
|                | 5        | 19.770  | Death                                 | .929           | .048              | 2                     | 25    |
|                | 6        | 26.070  | Survival                              | .              | .                 | 2                     | 24    |
|                | 7        | 39.570  | Death                                 | .891           | .060              | 3                     | 23    |
|                | 8        | 42.100  | Death                                 | .852           | .069              | 4                     | 22    |
|                | 9        | 42.100  | Survival                              | .              | .                 | 4                     | 21    |
|                | 10       | 49.800  | Death                                 | .811           | .076              | 5                     | 20    |
|                | 11       | 51.830  | Survival                              | .              | .                 | 5                     | 19    |
|                | 12       | 52.300  | Survival                              | .              | .                 | 5                     | 18    |
|                | 13       | 56.000  | Survival                              | .              | .                 | 5                     | 17    |
|                | 14       | 58.900  | Death                                 | .764           | .086              | 6                     | 16    |
|                | 15       | 63.630  | Death                                 | .716           | .093              | 7                     | 15    |
|                | 16       | 73.070  | Survival                              | .              | .                 | 7                     | 14    |
|                | 17       | 74.330  | Death                                 | .665           | .099              | 8                     | 13    |
|                | 18       | 81.370  | Death                                 | .614           | .104              | 9                     | 12    |
|                | 19       | 83.630  | Death                                 | .563           | .107              | 10                    | 11    |
|                | 20       | 86.200  | Survival                              | .              | .                 | 10                    | 10    |
|                | 21       | 90.630  | Survival                              | .              | .                 | 10                    | 9     |
|                | 22       | 91.670  | Death                                 | .500           | .112              | 11                    | 8     |
|                | 23       | 94.530  | Survival                              | .              | .                 | 11                    | 7     |
|                | 24       | 97.000  | Survival                              | .              | .                 | 11                    | 6     |
|                | 25       | 100.300 | Survival                              | .              | .                 | 11                    | 5     |
|                | 26       | 103.000 | Death                                 | .400           | .127              | 12                    | 4     |
|                | 27       | 104.330 | Death                                 | .300           | .128              | 13                    | 3     |
|                | 28       | 104.530 | Survival                              | .              | .                 | 13                    | 2     |
|                | 29       | 106.070 | Death                                 | .              | .                 | 14                    | 1     |
|                | 30       | 106.070 | Death                                 | .000           | .000              | 15                    | 0     |

**Supplementary Table 3: Correlation between survival of ECC patients and both OCT4 and VEGF-C expression**

| Group       | Time (m) | Status  | Cumulative proportion of the survival |                | Cumulative number | Remaining case number |    |
|-------------|----------|---------|---------------------------------------|----------------|-------------------|-----------------------|----|
|             |          |         | Estimation                            | Standard error |                   |                       |    |
| OCT4+VEGFC+ | 1        | 9.800   | Death                                 | .909           | .087              | 1                     | 10 |
|             | 2        | 14.030  | Survival                              | .              | .                 | 1                     | 9  |
|             | 3        | 19.570  | Survival                              | .              | .                 | 1                     | 8  |
|             | 4        | 23.170  | Death                                 | .795           | .131              | 2                     | 7  |
|             | 5        | 29.000  | Death                                 | .682           | .154              | 3                     | 6  |
|             | 6        | 29.570  | Death                                 | .568           | .165              | 4                     | 5  |
|             | 7        | 31.900  | Death                                 | .455           | .166              | 5                     | 4  |
|             | 8        | 32.730  | Death                                 | .341           | .159              | 6                     | 3  |
|             | 9        | 44.470  | Survival                              | .              | .                 | 6                     | 2  |
|             | 10       | 56.730  | Death                                 | .170           | .144              | 7                     | 1  |
|             | 11       | 100.300 | Death                                 | .000           | .000              | 8                     | 0  |
| OCT4+       | 1        | 19.770  | Death                                 | .750           | .217              | 1                     | 3  |
|             | 2        | 42.100  | Death                                 | .500           | .250              | 2                     | 2  |
|             | 3        | 71.530  | Survival                              | .              | .                 | 2                     | 1  |
|             | 4        | 86.200  | Death                                 | .000           | .000              | 3                     | 0  |
| VEGFC+      | 1        | 33.370  | Death                                 | .929           | .069              | 1                     | 13 |
|             | 2        | 38.870  | Survival                              | .              | .                 | 1                     | 12 |
|             | 3        | 39.730  | Survival                              | .              | .                 | 1                     | 11 |
|             | 4        | 43.070  | Death                                 | .844           | .102              | 2                     | 10 |
|             | 5        | 56.000  | Survival                              | .              | .                 | 2                     | 9  |
|             | 6        | 64.530  | Survival                              | .              | .                 | 2                     | 8  |
|             | 7        | 68.170  | Survival                              | .              | .                 | 2                     | 7  |
|             | 8        | 77.570  | Death                                 | .724           | .142              | 3                     | 6  |
|             | 9        | 78.000  | Survival                              | .              | .                 | 3                     | 5  |
|             | 10       | 84.330  | Death                                 | .579           | .172              | 4                     | 4  |
|             | 11       | 86.200  | Death                                 | .434           | .180              | 5                     | 3  |
|             | 12       | 90.630  | Death                                 | .289           | .168              | 6                     | 2  |
|             | 13       | 93.070  | Survival                              | .              | .                 | 6                     | 1  |
|             | 14       | 95.830  | Death                                 | .000           | .000              | 7                     | 0  |
| OCT4-VEGFC- | 1        | 12.670  | Death                                 | .962           | .038              | 1                     | 25 |
|             | 2        | 13.370  | Survival                              | .              | .                 | 1                     | 24 |
|             | 3        | 26.070  | Survival                              | .              | .                 | 1                     | 23 |
|             | 4        | 39.570  | Death                                 | .920           | .055              | 2                     | 22 |
|             | 5        | 42.100  | Survival                              | .              | .                 | 2                     | 21 |
|             | 6        | 49.800  | Death                                 | .876           | .067              | 3                     | 20 |
|             | 7        | 51.830  | Survival                              | .              | .                 | 3                     | 19 |
|             | 8        | 52.300  | Survival                              | .              | .                 | 3                     | 18 |
|             | 9        | 58.900  | Death                                 | .827           | .079              | 4                     | 17 |
|             | 10       | 63.630  | Death                                 | .779           | .088              | 5                     | 16 |
|             | 11       | 73.070  | Survival                              | .              | .                 | 5                     | 15 |
|             | 12       | 74.330  | Death                                 | .727           | .096              | 6                     | 14 |
|             | 13       | 81.370  | Death                                 | .675           | .103              | 7                     | 13 |
|             | 14       | 83.630  | Death                                 | .623           | .107              | 8                     | 12 |
|             | 15       | 86.200  | Survival                              | .              | .                 | 8                     | 11 |
|             | 16       | 90.630  | Survival                              | .              | .                 | 8                     | 10 |
|             | 17       | 91.670  | Death                                 | .561           | .113              | 9                     | 9  |
|             | 18       | 94.000  | Death                                 | .498           | .116              | 10                    | 8  |
|             | 19       | 94.530  | Survival                              | .              | .                 | 10                    | 7  |
|             | 20       | 97.000  | Survival                              | .              | .                 | 10                    | 6  |
|             | 21       | 100.300 | Survival                              | .              | .                 | 10                    | 5  |
|             | 22       | 103.000 | Death                                 | .399           | .129              | 11                    | 4  |
|             | 23       | 104.330 | Death                                 | .299           | .130              | 12                    | 3  |
|             | 24       | 104.530 | Survival                              | .              | .                 | 12                    | 2  |
|             | 25       | 106.070 | Death                                 | .              | .                 | 13                    | 1  |
|             | 26       | 106.070 | Death                                 | .000           | .000              | 14                    | 0  |
